# Supplementary material for: Design and fabrication of a liver-on-a-chip platform for convenient, highly efficient, and safein situperfusion culture of 3D hepatic spheroids
Source: Royal Society of Chemistry journal article supplement (doi:10.1039/c8lc00333e), 2018-01-01
Supplement: c8lc00333e1.pdf [file c8lc00333e1.pdf]

## Supplemental document

**Table S1.** Model parameters for oxygen transport and consumption at 37 °C.

| Description                                                 | Parameters    | Value                                                                                                     | References |
|-------------------------------------------------------------|---------------|-----------------------------------------------------------------------------------------------------------|------------|
| Henry's constant for oxygen                                 | $K_{H,O_2}$   | $1.32 \times 10^{-3} \text{ mol}\cdot\text{m}^{-3}\cdot\text{mmHg}^{-1}$                                  | [1]        |
| Oxygen partial pressure in atmosphere                       | $P_{O_2}$     | 159 mmHg                                                                                                  | [1,2]      |
| Oxygen concentration in medium entering the system          | $C_{in,O_2}$  | 0.21 mol/m <sup>3</sup>                                                                                   | [3,4]      |
| Oxygen diffusion in medium                                  | $D_{O_2}$     | $3 \times 10^{-9} \text{ m}^2/\text{s}$                                                                   | [3,4,9]    |
| Oxygen permeability in PDMS                                 | $P_{PDMS}$    | $3.786 \times 10^{-11} \text{ mol}\cdot\text{m}\cdot\text{m}^{-2}\cdot\text{s}^{-1}\cdot\text{mmHg}^{-1}$ | [5,6]      |
| Hepatocyte maximum oxygen consumption rate                  | $V_{max,O_2}$ | $4.8 \times 10^{-17} \text{ mol}\cdot\text{cell}^{-1}\cdot\text{s}^{-1}$                                  | [3,7,8]    |
| Michaelis-Menten constant for hepatocyte oxygen consumption | $K_{m,O_2}$   | 0.5 mmHg                                                                                                  | [3,8]      |

**Table S2.** The primers used for real-time RT-PCR in this study.

| Gene Symbol  | Primers (forward/reverse; 5' to 3')          |
|--------------|----------------------------------------------|
| CYP1A1       | GATGGTCAAGGAGCACTACA/AAAGAGGTCCAAGACGATGT    |
| CYP1A2       | TCAATGACATCTTTGGAGCAG/CTCTGTATCTCAGGCTTGGTC  |
| CYP2B6       | GGGAGATTGAACAGGTGATTG/GATGATGTACCCTCGGAAGC   |
| CYP2C9       | GGATTTGTGTGGGAGAAGC/TGAAGCACAGCTGGTAGAAG     |
| CYP2D6       | CGCATCCCTAAGGGAACGACA/CAGGAAGTGTTCGGGGTGGAA  |
| CYP2E1       | CCATCAAGGATAGGCAAGAG/TCCAGAGTTGGCACTACGAC    |
| CYP3A4       | TGCTCTACCATAAGGGCTT/GGCTGTTGACCATCATAAAAG    |
| CYP3A5       | ATATGGGACCCGTACACATG/CAGAGACCCTGACGATAGGAC   |
| UGT1A1       | GAATCAACTGCCTTACCAA/GACTGTCTGAGGGATTTTGC     |
| UGT2B4       | TGTCTACAGCCTCCGCTTCT/GAACTGATCCCATTCTTCATG   |
| SULT1A1      | GAGCCGCACCCACCCTGTT/TGAACGACGTGTGCTGAACCAC   |
| SULT2A1      | AAAGACGTTAGAACCCGAAGA/TTTCCAGTCCCAGATACACC   |
| OAT2         | GTGATGCTGCTGGCACTGGTT/CTCTTTCACATGGCCTTGGGTC |
| OCT1         | AAGAGGATGTCACCGAAAAGC/GGATGAGCCCCTGATAGAGCA  |
| SLCO1B3      | GCCTAACCTTGACCTATGAT/CAGGTAAGTTATTCCATTGTTT  |
| SLCO2B1      | GGGAGTCCACGAAGAAGCAG/GACAGGACCACCAGCAGGAA    |
| AHR          | GGTTGTGATGCCAAAGGAAGA/TCATTGCGATATGGGACTCG   |
| RXR $\alpha$ | TCGTCTCTTTAACCTGACTC/GCTGCTCTGGGTACTTGTGCT   |
| PXR          | GGTCCCAAATCTGCCGTGTA/CCGGGCGTTGCGTTTCATG     |
| CAR          | TTGCAGAAGTGCTTAGATGCT/TCAGCTCTTCTGCTCCTTACT  |
| MRP2         | GACAATTCTAATCTAGCTACTCC/CATCAACTCCCAGACATCC  |
| BCRP         | GTTCTTGGATGAGCCTACA/CTGAGGCCAATAAGGTCA       |
| MDR1         | GCTCGTGCCCTTGTTAGAC/GTGCCATGCTCCTTGACTC      |
| BSEP         | CCCTCATCCGAAATCCAAGA/TGCAGTGCCATGTTCAAACC    |
| Albumin      | ACCCCAAGTGTCAACTCAA/GGTTTCAGGACCACGGATAGA    |

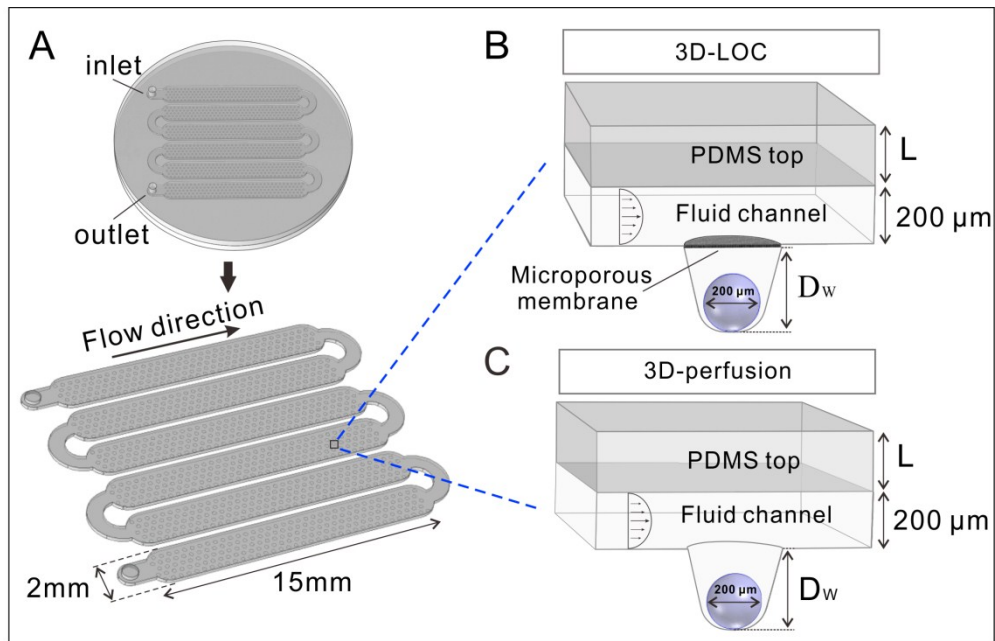

**Figure S1.** FEM model geometry of the 3D-LOC for the simulation analysis of flow and oxygen mass transfer. (A) 3D geometry of the modeled microfluidic channel, which contained  $180 \times 6$  arrays of microwells. (B) A single microwell geometry of 3D-LOC, which contained a microporous membrane and a  $\text{Ø } 200 \mu\text{m}$  cell spheroid. The microwell had a V-shape cross section with round bottom ( $\text{Ø } 250 \mu\text{m} \times 25^\circ$  Angle). The fluid channel height, top PDMS layer thickness and microwell depth were  $200 \mu\text{m}$ ,  $L$  and  $D_w$ , respectively. (C) For comparison, a single microwell geometry with open microwell (Conventional perfusion method, 3D-perfusion) was also constructed and the dimension parameters were the same as those in (B).

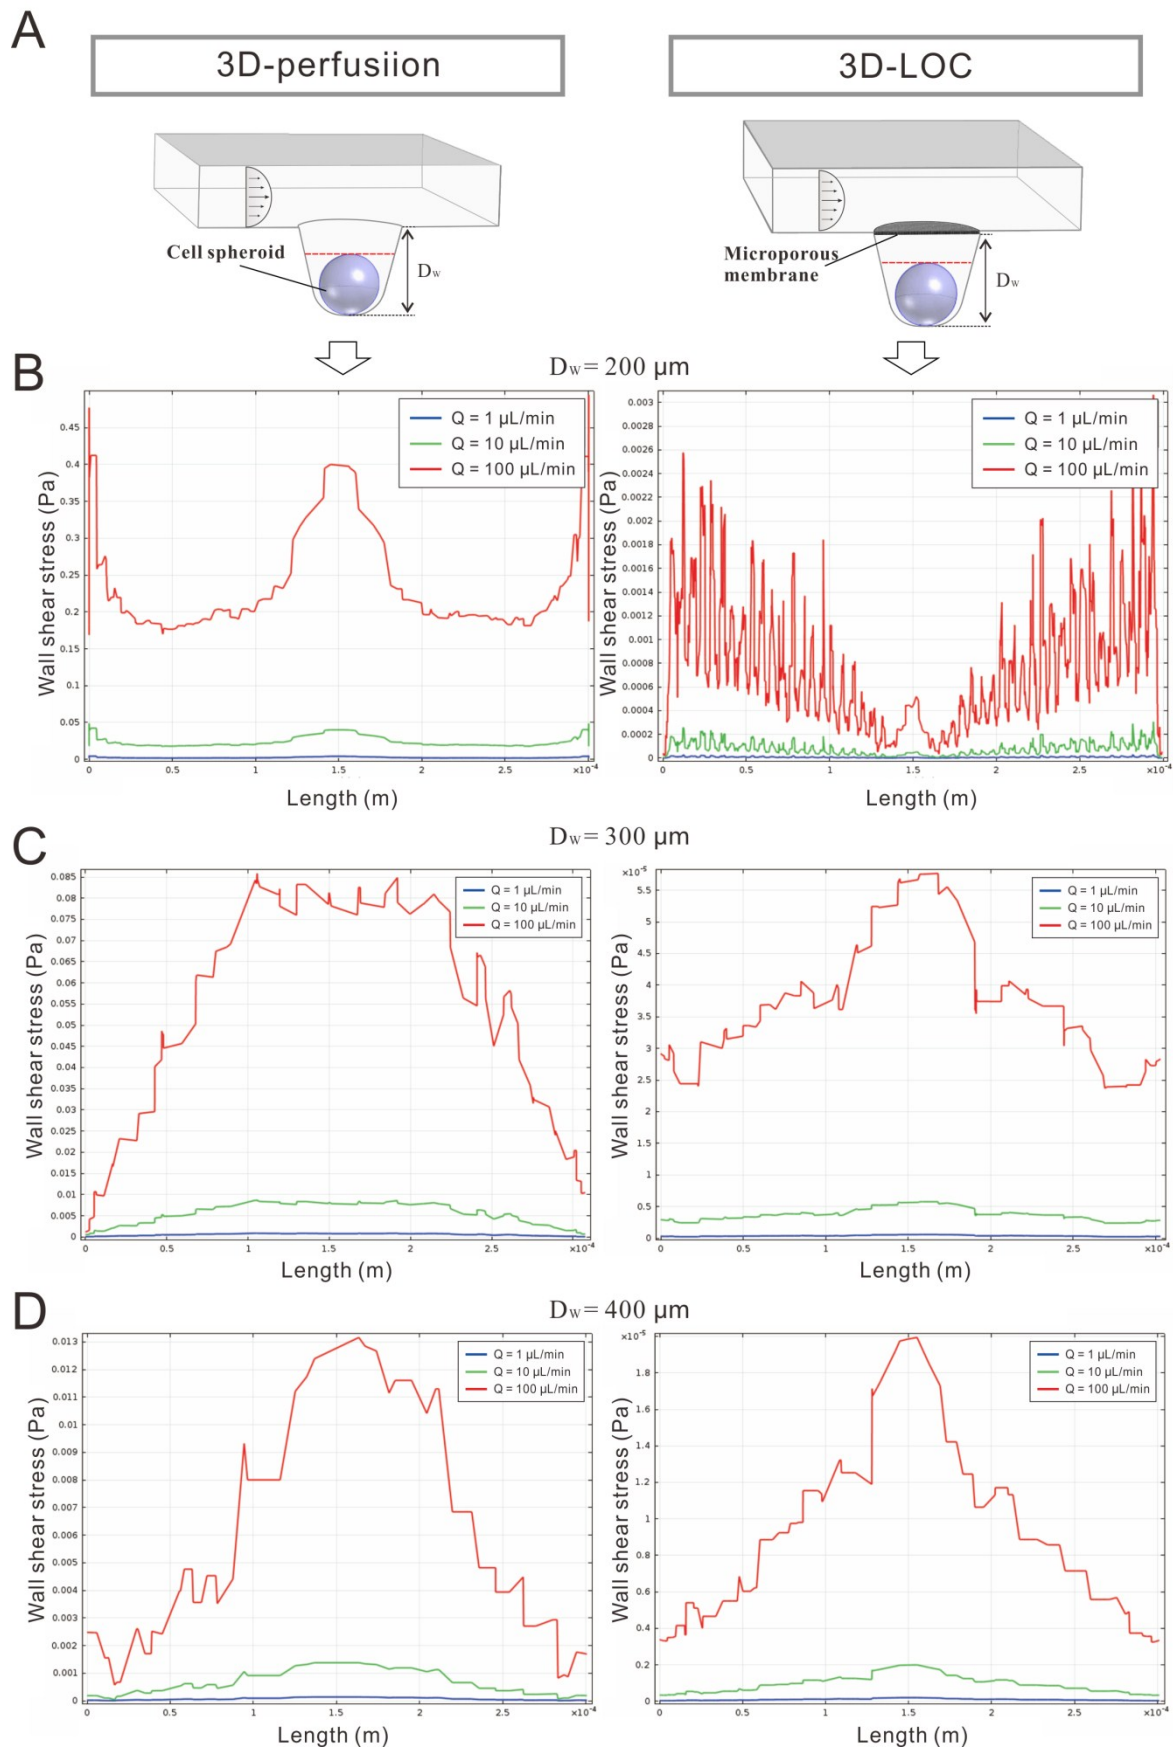

**Figure S2.** A comparison of wall shear stress in two different perfusion methods (3D-perfusiion and 3D-LOC). The wall shear stress distribution along the top red cut lines of the cell spheroid, described in (A), were plotted in different microwell depth configurations including (B)  $D_w = 200 \mu\text{m}$ , (C)  $D_w = 300 \mu\text{m}$ , and (D)  $D_w = 400 \mu\text{m}$ .

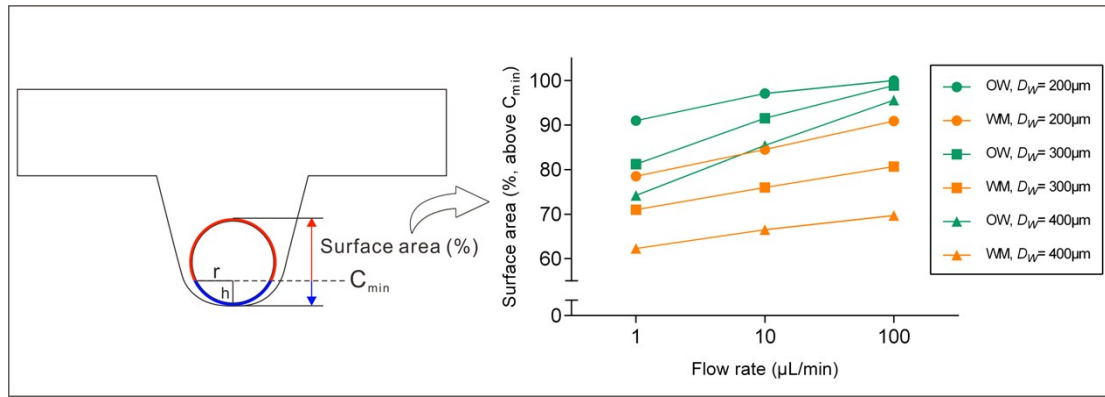

**Figure S3.** The percentage of the surface area of the cell spheroid (Oxygen concentration  $> C_{min}$ ) in the 3D-perfusion method with open microwell (OW) and in the 3D-LOC method with membrane (MW) at different microwell depths ( $D_W = 200, 300$  and  $400 \mu\text{m}$ ) and flow rates ( $Q = 1, 10$  and  $100 \mu\text{L}/\text{min}$ ).

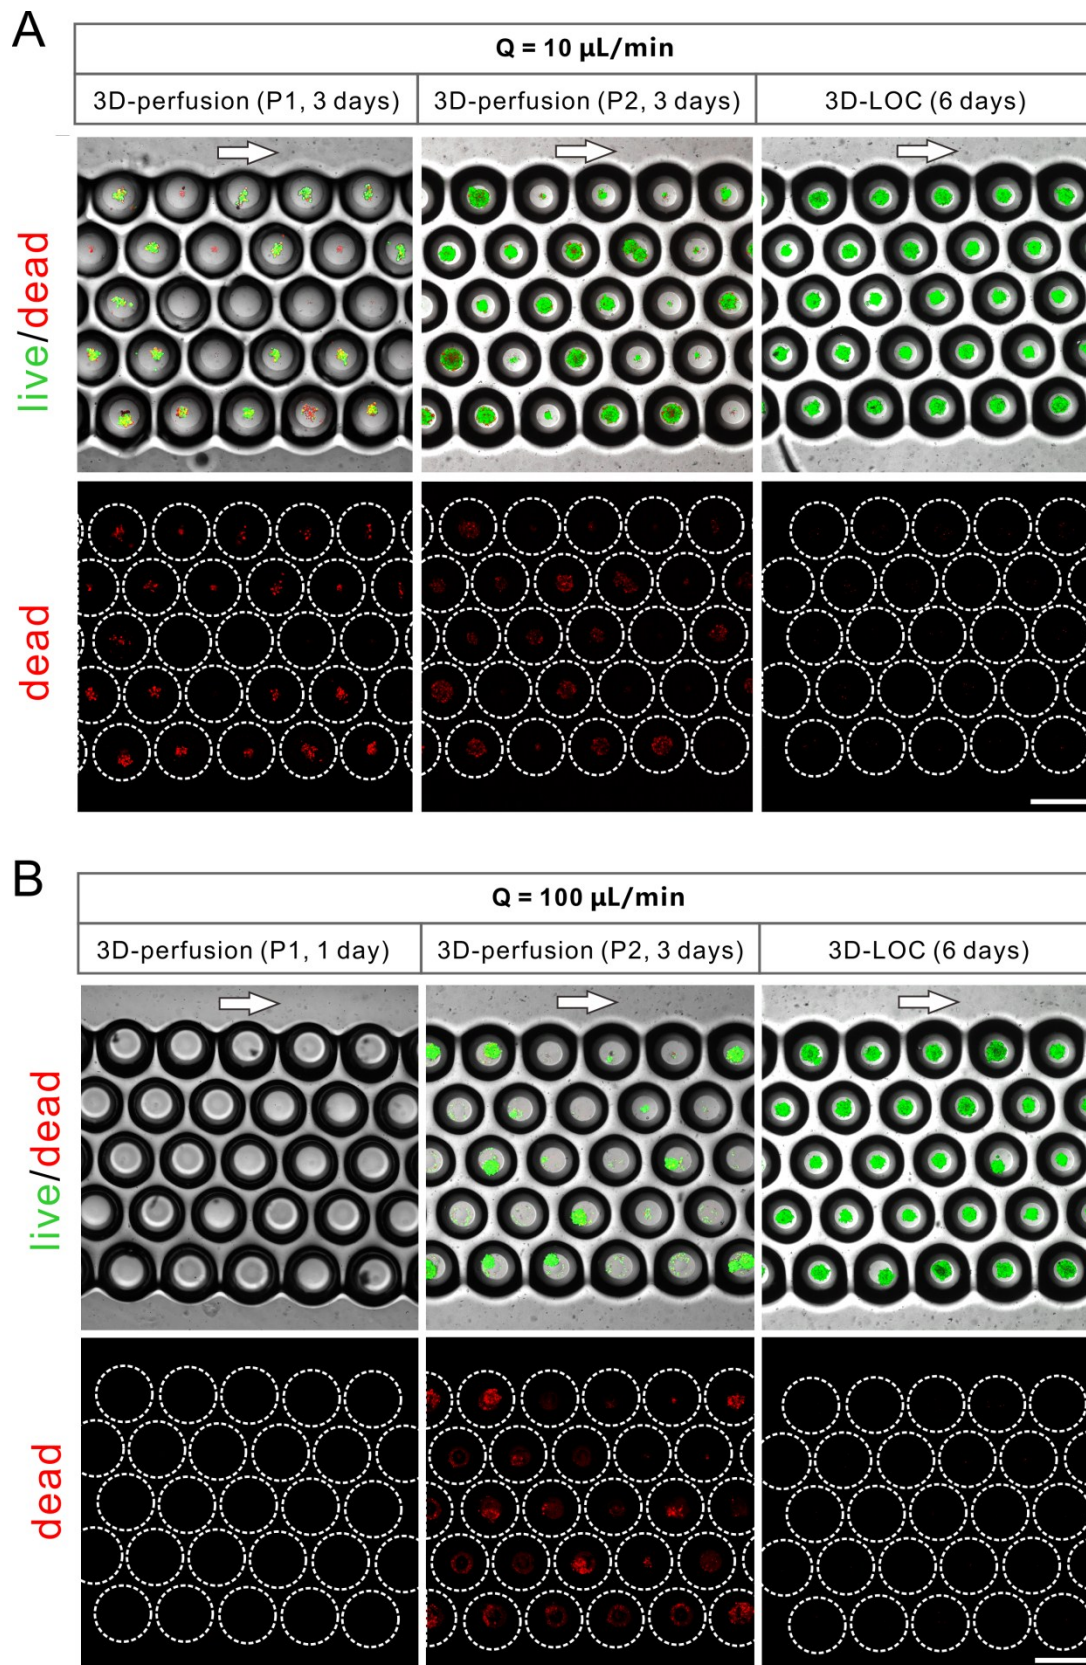

**Figure S4.** A comparison of cell spheroids viability and loss status in three different perfusion methods (3D-perfusion (P1), 3D-perfusion (P2), and 3D-LOC) perfused cultured for 1-6 days at different flow rates including (A)  $Q = 10 \mu\text{L}/\text{min}$ , and (B)  $Q = 100 \mu\text{L}/\text{min}$ . White arrows indicate the direction of fluid flow. Scale bars = 400  $\mu\text{m}$ .

### Supplementary References

1. G. Mattei, S. Giusti and A. Ahluwalia, *Processes*, 2014, 2, 548-569.
2. A. R. Frisncho, *Science*, 1975, 187, 313-319.
3. D. Mazzei, M. A. Guzzardi, S. Giusti and A. Ahluwalia, *Biotechnology and bioengineering*, 2010, 106, 127-137.
4. P. Buchwald, *Theoretical biology & medical modelling*, 2011, 8, 20.
5. S. Giulitti, E. Magrofuoco, L. Prevedello and N. Elvassore, *Lab on a chip*, 2013, 13, 4430-4441.
6. E. Cimetta, M. Flaibani, M. Mella, E. Serena, L. Boldrin, P. De Coppi and N. Elvassore, *The International journal of artificial organs*, 2007, 30, 415-428.
7. S. L. Nyberg, R. P. Remmel, H. J. Mann, M. V. Peshwa, W. S. Hu and F. B. Cerra, *Annals of surgery*, 1994, 220, 59-67.
8. J. F. Patzer, 2nd, *Artif Organs*, 2004, 28, 83-98.
9. J. C. Haselgrove, I. M. Shapiro and S. F. Silverton, *The American journal of physiology*, 1993, 265, C497-506.
